# Supplementary material
Source: PubMed Central journal article supplement (PMC6437487)
Supplement: AAC.02142-18-s0001.pdf [file AAC.02142-18-s0001.pdf]

**Table S1.** Adverse events reported following the administration of a single oral dose of 200 mg grazoprevir with or without the coadministration of multiple twice-daily oral doses of 100 mg ritonavir for 15 days to healthy adult participants (Trial 1)<sup>a</sup>

| <b>Adverse event, n (%)</b>       | <b>GZR alone (N = 10)</b> | <b>RTV alone (N = 10)</b> | <b>GZR + RTV (N = 10)</b> |
|-----------------------------------|---------------------------|---------------------------|---------------------------|
| Vision blurred                    | 0 (0)                     | 1 (10.0)                  | 0 (0)                     |
| Abdominal discomfort              | 0 (0)                     | 1 (10.0)                  | 1 (10.0)                  |
| Abdominal distension              | 0 (0)                     | 1 (10.0)                  | 0 (0)                     |
| Abdominal pain                    | 0 (0)                     | 0 (0)                     | 1 (10.0)                  |
| Diarrhea                          | 0 (0)                     | 1 (10.0)                  | 1 (10.0)                  |
| Dyspepsia                         | 0 (0)                     | 1 (10.0)                  | 0 (0)                     |
| Flatulence                        | 0 (0)                     | 1 (10.0)                  | 0 (0)                     |
| Nausea                            | 1 (10.0)                  | 0 (0)                     | 1 (10.0)                  |
| Discomfort                        | 0 (0)                     | 0 (0)                     | 1 (10.0)                  |
| Fatigue                           | 0 (0)                     | 3 (30.0)                  | 2 (20.0)                  |
| Hangover                          | 0 (0)                     | 0 (0)                     | 1 (10.0)                  |
| Impetigo                          | 0 (0)                     | 0 (0)                     | 1 (10.0)                  |
| Upper respiratory tract infection | 0 (0)                     | 0 (0)                     | 1 (10.0)                  |
| Foreign body in eye               | 1 (10.0)                  | 0 (0)                     | 0 (0)                     |
| Laceration                        | 0 (0)                     | 1 (10.0)                  | 0 (0)                     |
| Dizziness                         | 0 (0)                     | 0 (0)                     | 1 (10.0)                  |
| Headache                          | 3 (30.0)                  | 3 (30.0)                  | 5 (50.0)                  |
| Syncope                           | 0 (0)                     | 0                         | 1 (10.0)                  |
| Oropharyngeal pain                | 0 (0)                     | 1 (10.0)                  | 0 (0)                     |

<sup>a</sup>Abbreviations: GZR, grazoprevir; RTV, ritonavir.

**Table S2.** Adverse events reported following coadministration of grazoprevir 200 mg once daily and 300 mg atazanavir/100 mg ritonavir once daily, 400 mg lopinavir/100 mg ritonavir twice daily, or 600 mg darunavir/100 mg ritonavir twice daily for 7 days vs administration of grazoprevir 200 mg once daily for 7 days to healthy adult participants (Trial 2)<sup>a</sup>

| <b>Adverse event, n (%)</b>       | <b>GZR alone (N = 13)</b> | <b>ATV/RTV alone (N = 12)</b> | <b>GZR + ATV/RTV (N = 11)</b> |
|-----------------------------------|---------------------------|-------------------------------|-------------------------------|
| Abnormal sensation in eye         | 0 (0)                     | 0 (0)                         | 1 (9.1)                       |
| Diarrhea                          | 0 (0)                     | 1 (8.3)                       | 0 (0)                         |
| Flatulence                        | 0 (0)                     | 1 (8.3)                       | 0 (0)                         |
| Nausea                            | 1 (7.7)                   | 2 (16.7)                      | 0 (0)                         |
| Vomiting                          | 1 (7.7)                   | 0 (0)                         | 0 (0)                         |
| Chest pain                        | 0 (0)                     | 1 (8.3)                       | 0 (0)                         |
| Vessel puncture–site pruritus     | 1 (7.7)                   | 0 (0)                         | 0 (0)                         |
| Vessel puncture–site reaction     | 1 (7.7)                   | 0 (0)                         | 0 (0)                         |
| Upper respiratory tract infection | 0 (0)                     | 1 (8.3)                       | 0 (0)                         |
| Dizziness                         | 0 (0)                     | 1 (8.3)                       | 0 (0)                         |
| Headache                          | 0 (0)                     | 3 (25.0)                      | 1 (9.1)                       |
| Paresthesia                       | 1 (7.7)                   | 0 (0)                         | 0 (0)                         |
| Somnolence                        | 0 (0)                     | 0 (0)                         | 1 (9.1)                       |
| Anxiety                           | 1 (7.7)                   | 0 (0)                         | 0 (0)                         |
| Insomnia                          | 1 (7.7)                   | 0 (0)                         | 0 (0)                         |
| Dyspnea                           | 1 (7.7)                   | 0 (0)                         | 0 (0)                         |
| Oropharyngeal pain                | 0 (0)                     | 1 (8.3)                       | 0 (0)                         |
| Productive cough                  | 0 (0)                     | 1 (8.3)                       | 0 (0)                         |
| Rhinorrhea                        | 0 (0)                     | 1 (8.3)                       | 0 (0)                         |
| Erythema                          | 0 (0)                     | 0 (0)                         | 1 (9.1)                       |
| Pruritus, generalized             | 0 (0)                     | 1 (8.3)                       | 0 (0)                         |
| Rash, maculo-papular              | 0 (0)                     | 1 (8.3)                       | 0 (0)                         |
| Vitiligo                          | 0 (0)                     | 0 (0)                         | 1 (9.1)                       |
| <b>Adverse event, n (%)</b>       | <b>GZR alone (N = 13)</b> | <b>LPV/RTV alone (N = 13)</b> | <b>GZR + LPV/RTV (N = 13)</b> |
| Abdominal pain                    | 0 (0)                     | 1 (7.7)                       | 0 (0)                         |
| Constipation                      | 1 (7.7)                   | 0 (0)                         | 0 (0)                         |
| Diarrhea                          | 0 (0)                     | 3 (23.1)                      | 0 (0)                         |
| Nausea                            | 0 (0)                     | 1 (7.7)                       | 0 (0)                         |
| Upper respiratory tract infection | 0 (0)                     | 1 (7.7)                       | 0 (0)                         |
| Viral infection                   | 1 (7.7)                   | 2 (15.4)                      | 0 (0)                         |

|                                     |                           |                               |                               |
|-------------------------------------|---------------------------|-------------------------------|-------------------------------|
| Alanine aminotransferase increased  | 0 (0)                     | 0 (0)                         | 1 (7.7)                       |
| Gamma-glutamyltransferase increased | 0 (0)                     | 0 (0)                         | 1 (7.7)                       |
| Neutrophil count decreased          | 0 (0)                     | 0 (0)                         | 1 (7.7)                       |
| Decreased appetite                  | 0 (0)                     | 1 (7.7)                       | 0 (0)                         |
| Flank pain                          | 1 (7.7)                   | 0 (0)                         | 0 (0)                         |
| Headache                            | 2 (15.4)                  | 3 (23.1)                      | 1 (7.7)                       |
| Memory impairment                   | 0 (0)                     | 1 (7.7)                       | 0 (0)                         |
| Paresthesia                         | 0 (0)                     | 1 (7.7)                       | 0 (0)                         |
| Epistaxis                           | 0 (0)                     | 0 (0)                         | 1 (7.7)                       |
| Productive cough                    | 0 (0)                     | 0 (0)                         | 1 (7.7)                       |
| <b>Adverse event, n (%)</b>         | <b>GZR alone (N = 13)</b> | <b>DRV/RTV alone (N = 12)</b> | <b>GZR + DRV/RTV (N = 12)</b> |
| Abdominal pain, upper               | 1 (7.7)                   | 0 (0)                         | 0 (0)                         |
| Nausea                              | 1 (7.7)                   | 0 (0)                         | 0 (0)                         |
| Vomiting                            | 1 (7.7)                   | 0 (0)                         | 0 (0)                         |
| Upper respiratory tract infection   | 0 (0)                     | 2 (16.7)                      | 1 (8.3)                       |
| Alanine aminotransferase increased  | 1 (7.7)                   | 0 (0)                         | 0 (0)                         |
| Flank pain                          | 0 (0)                     | 0 (0)                         | 1 (8.3)                       |
| Neck pain                           | 0 (0)                     | 0 (0)                         | 1 (8.3)                       |
| Headache                            | 2 (15.4)                  | 2 (16.7)                      | 1 (8.3)                       |
| Dysphonia                           | 0 (0)                     | 1 (8.3)                       | 0 (0)                         |
| Papule                              | 0 (0)                     | 1 (8.3)                       | 0 (0)                         |

<sup>a</sup>Abbreviations: ATV, atazanavir; DRV, darunavir; GZR, grazoprevir; LPV, lopinavir; RTV, ritonavir.

**Table S3.** Adverse events reported following coadministration of elbasvir 50 mg once daily and 300 mg atazanavir/100 mg ritonavir once daily, 400 mg lopinavir/100 mg ritonavir twice daily, or 600 mg darunavir/100 mg ritonavir twice daily for 7 days vs administration of grazoprevir 200 mg once daily for 7 days to healthy adult participants (Trial 3)<sup>a</sup>

| <b>Adverse event, n (%)</b>       | <b>EBR alone (N = 10)</b> | <b>ATV/RTV alone (N = 10)</b> | <b>EBR + ATV/RTV (N = 8)</b> |
|-----------------------------------|---------------------------|-------------------------------|------------------------------|
| Jaundice                          | 0 (0)                     | 1 (10.0)                      | 0 (0)                        |
| Excoriation                       | 0 (0)                     | 1 (10.0)                      | 0 (0)                        |
| Dizziness, postural               | 1 (10.0)                  | 0 (0)                         | 0 (0)                        |
| Dysgeusia                         | 1 (10.0)                  | 0 (0)                         | 0 (0)                        |
| Headache                          | 1 (10.0)                  | 1 (10.0)                      | 0 (0)                        |
| Nasal congestion                  | 0 (0)                     | 1 (10.0)                      | 0 (0)                        |
| Oropharyngeal pain                | 0 (0)                     | 1 (10.0)                      | 0 (0)                        |
| Rhinorrhea                        | 1 (10.0)                  | 1 (10.0)                      | 0 (0)                        |
| Sinus congestion                  | 1 (10.0)                  | 0 (0)                         | 0 (0)                        |
| Pruritus                          | 0 (0)                     | 1 (10.0)                      | 0 (0)                        |
| Rash, maculo-papular              | 0 (0)                     | 1 (10.0)                      | 0 (0)                        |
| <b>Adverse events, n (%)</b>      | <b>EBR Alone (N = 10)</b> | <b>LPV/RTV (N = 10)</b>       | <b>EBR + LPV/RTV (N = 9)</b> |
| Abdominal pain                    | 1 (10.0)                  | 2 (20.0)                      | 0 (0)                        |
| Diarrhea                          | 0 (0)                     | 6 (60.0)                      | 2 (22.2)                     |
| Dyspepsia                         | 1 (10.0)                  | 2 (20.0)                      | 1 (11.1)                     |
| Flatulence                        | 1 (10.0)                  | 0 (0)                         | 0 (0)                        |
| Nausea                            | 1 (10.0)                  | 1 (10.0)                      | 0 (0)                        |
| Vomiting                          | 0 (0)                     | 1 (10.0)                      | 1 (11.1)                     |
| Asthenia                          | 0 (0)                     | 1 (10.0)                      | 0 (0)                        |
| Irritability                      | 1 (10.0)                  | 0 (0)                         | 0 (0)                        |
| Herpes zoster                     | 0 (0)                     | 0 (0)                         | 1 (11.1)                     |
| Oral herpes                       | 1 (10.0)                  | 0 (0)                         | 0 (0)                        |
| Upper respiratory tract infection | 0 (0)                     | 0 (0)                         | 1 (11.1)                     |
| Musculoskeletal stiffness         | 1 (10.0)                  | 0 (0)                         | 0 (0)                        |
| Myalgia                           | 1 (10.0)                  | 0 (0)                         | 0 (0)                        |
| Headache                          | 1 (10.0)                  | 0 (0)                         | 1 (11.1)                     |
| Libido decreased                  | 1 (10.0)                  | 0 (0)                         | 0 (0)                        |
| Nervousness                       | 0 (0)                     | 1 (10.0)                      | 0 (0)                        |
| Menstrual disorder                | 0 (0)                     | 1 (10.0)                      | 0 (0)                        |
| Metrorrhagia                      | 0 (0)                     | 1 (10.0)                      | 0 (0)                        |
| Oropharyngeal pain                | 1 (10.0)                  | 0 (0)                         | 0 (0)                        |
| Rhinorrhea                        | 0 (0)                     | 0 (0)                         | 1 (11.1)                     |

| <b>Adverse event, n (%)</b> | <b>EBR alone (N = 10)</b> | <b>DRV/RTV alone (N = 10)</b> | <b>EBR + DRV/RTV (N = 8)</b> |
|-----------------------------|---------------------------|-------------------------------|------------------------------|
| Dyspepsia                   | 1 (10.0)                  | 0 (0)                         | 0 (0)                        |
| Flatulence                  | 0 (0)                     | 1 (10.0)                      | 1 (12.5)                     |
| Nausea                      | 1 (10.0)                  | 0 (0)                         | 0 (0)                        |
| Irritability                | 0 (0)                     | 1 (10.0)                      | 0 (0)                        |
| Headache                    | 1 (10.0)                  | 1 (10.0)                      | 0 (0)                        |
| Abnormal dreams             | 0 (0)                     | 1 (10.0)                      | 0 (0)                        |
| Dysmenorrhea                | 0 (0)                     | 1 (10.0)                      | 0 (0)                        |
| Cough                       | 0 (0)                     | 1 (10.0)                      | 0 (0)                        |
| Rhinorrhea                  | 0 (0)                     | 1 (10.0)                      | 0 (0)                        |
| Pruritus                    | 0 (0)                     | 1 (10.0)                      | 0 (0)                        |
| Rash maculo-papular         | 0 (0)                     | 1 (10.0)                      | 0 (0)                        |
| Rash papular                | 0 (0)                     | 1 (10.0)                      | 0 (0)                        |

<sup>a</sup>Abbreviations: ATV, atazanavir; DRV, darunavir; EBR, elbasvir; LPV, lopinavir; RTV, ritonavir.
